# Supplementary material
Source: ML conference proceedings conference paper supplement (https://openreview.net/forum?id=sdF3MuyHtz)
Supplement: supplementary_material [file attachment]

# Supplementary Materials: Code of MMDFND

Anonymous Authors

## 1 SUPPLEMENTARY MATERIAL DESCRIPTION

Dear Reviewers, you can use our code by following these steps.

### 1.1 Data Preparation

- (1) **Data Splitting:** In the experiments, we maintain the same data splitting scheme as the benchmarks.
- (2) **Weibo21 Dataset:** For the Weibo21 dataset, we follow the work from (Ying et al., 2023).
- (3) **Weibo Dataset:** For the Weibo dataset, we adhere to the work from (Wang et al., 2022) and provide data including domain labels.
- (4) **Data Storage:**
  - Place the processed Weibo data in the `./data` directory.
  - Place the Weibo21 data in the `./Weibo_21` directory.

- (5) **Data preparation:** Use the scripts in the `./datapre` directory to prepare the data to save time during the data loading phase.

### 1.2 Pretrained Models

- (1) **Roberta:** You can download the pretrained Roberta model from Roberta(link) and you need to move all files into the `./pretrained_model` directory.
- (2) **MAE:** Download the pretrained MAE model from Masked Autoencoders: A PyTorch Implementation(link) and move all files into the root directory.

### 1.3 Training

- **Start Training:** After processing the data, train the model by running `python main.py`.
